# Supplementary material for: A Gene Signature for Predicting Outcome in Patients with Basal-like Breast Cancer
Source: PubMed Central journal article supplement — Sci Rep. 2012 Jan 17;2:227. doi: 10.1038/srep00227 (PMC3259129; doi:10.1038/srep00227), 2012-01-17
Supplement: srep00227-s1.pdf [file srep00227-s1.pdf]

# A Gene Signature for Predicting Outcome in Patients with Basal-like Breast Cancer

Robin M. Hallett, Anna Dvorkin-Gheva, Anita Bane and John A. Hassell

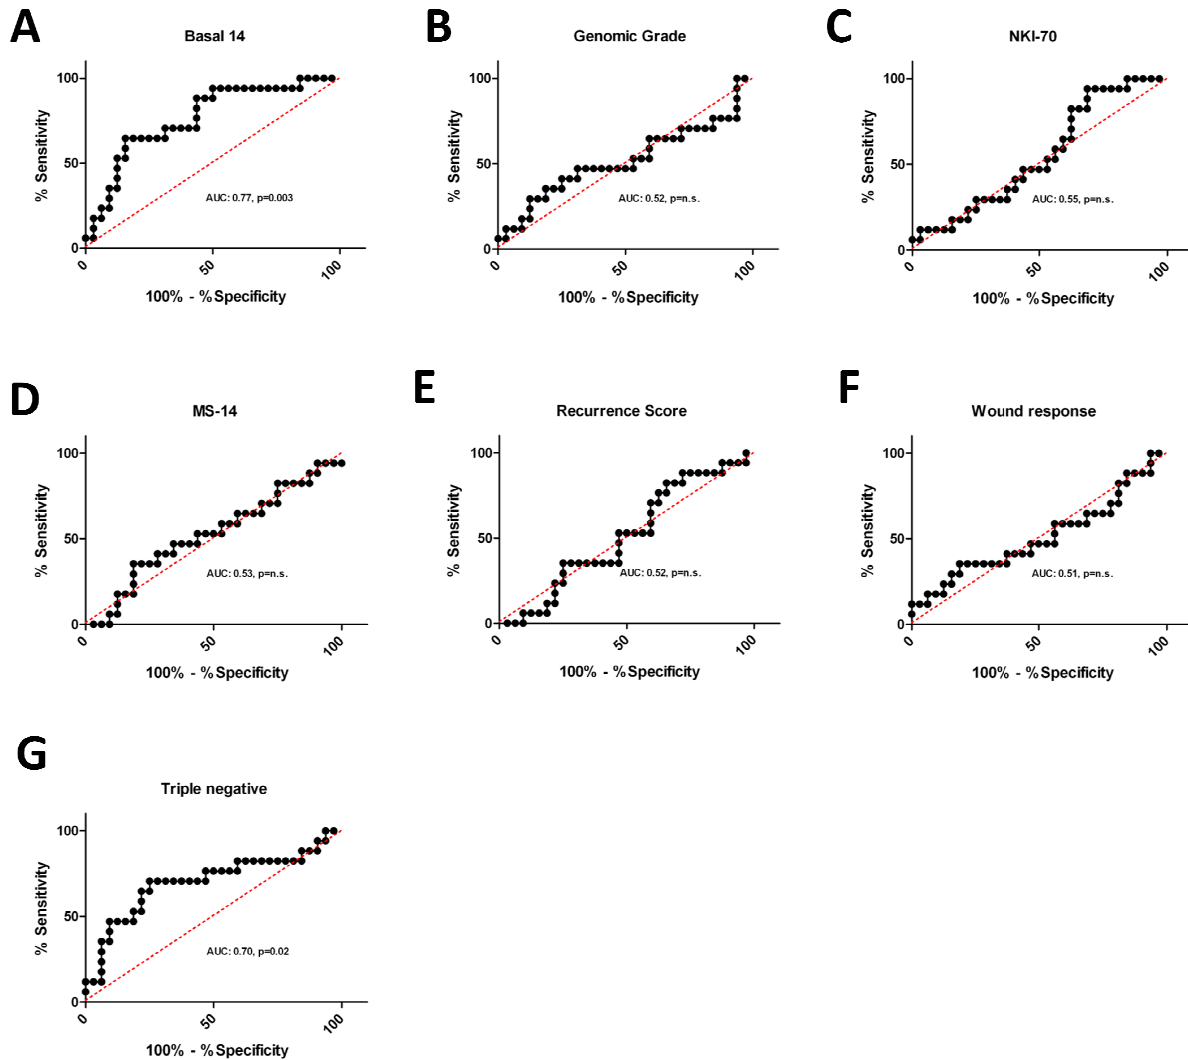

**Supplementary figure 1. ROC curves for multiple prognostic signatures reported in the literature.** ROC curves for **A)** Basal 14, **B)** Genomic Grade Index, **C)** NKI-70, **D)** Recurrence Score, **E)** CSR/Wound response, **F)** Triple Negative and **G)** MS-14 signatures. Only the Basal 14 (AUC: 0.77,  $p = 0.003$ ) and Triple negative (AUC: 0.7,  $p = 0.02$ ) signatures produced an AUC that was statistically significantly greater than 0.5.
